# Supplementary material for: Bioreactor Scalability: Laboratory-Scale Bioreactor Design Influences Performance, Ecology, and Community Physiology in Expanded Granular Sludge Bed Bioreactors
Source: PubMed Central journal article supplement (PMC5410579; doi:10.3389/fmicb.2017.00664), 2017-05-01
Supplement: Image1.pdf [file Image1.pdf]

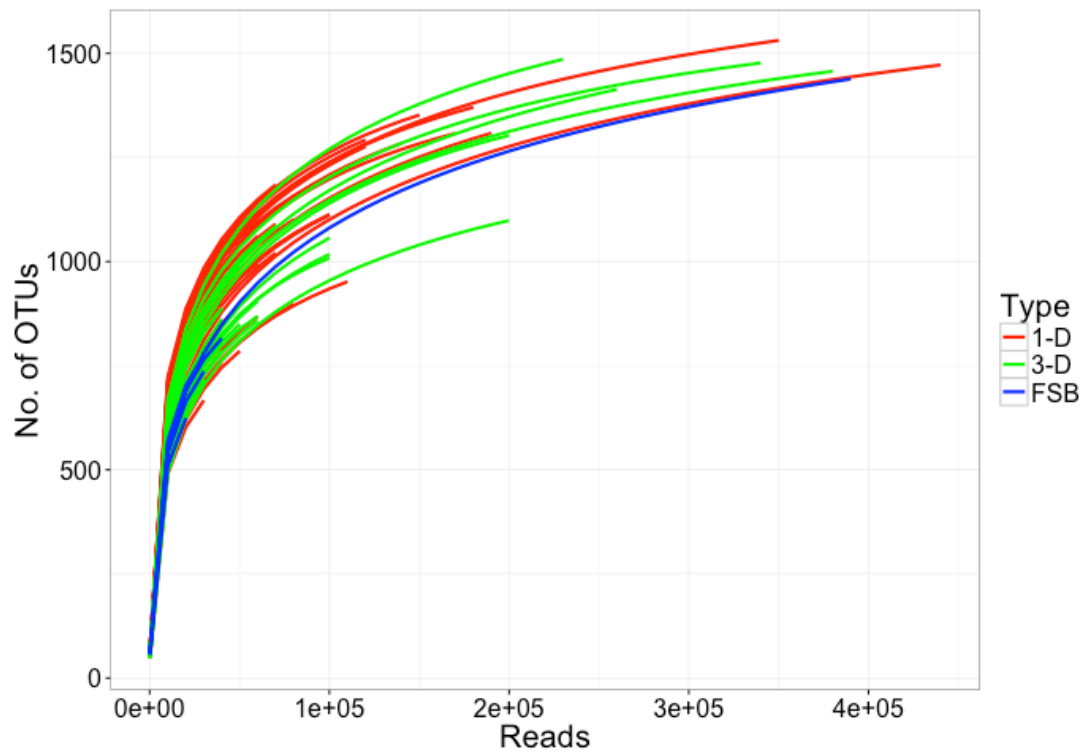

**S1:** Rarefaction curves (`rarefy()`, R Vegan) for all samples in the sample set grouped by bioreactor type: 1-D laboratory-scale (red), 3-D laboratory-scale (green) and full-scale FSB (blue). Curves show saturation is not reached for any sample sequenced.
